# Supplementary material
Source: publisher site journal article supplement (https://www.dovepress.com/get_supplementary_file.php?f=307407.docx)
Supplement: Supplementary file 1 [file get_supplementary_file.php]

**Supplementary Table 1 - Demographical and clinical characteristics of
enrolled patients from 2016 to 2019. No statistical difference resulted
for any considered variable.**

|  | **2016** | **2017** | **2018** | **2019** | **p-value** |
| --- | --- | --- | --- | --- | --- |
| **Patients, n** | 20 | 20 | 22 | 20 | - |
| **Age, years** | 60.1 ± 15.0 | 60.3 ± 16.4 | 58.9 ± 10.8 | 60.0 ± 10.2 | .987 |
| **Gender, Males (%)** | 60 | 75 | 64 | 70 | .748 |
| **Duration of symptoms, days** | 2 (1.0 – 4.7) | 2.5 (1.7 – 5.5) | 2 (1 – 4.5) | 2 (1.0 – 3.2) | .267 |
| **Etiology (%)**  **Idiopathic**  **Traumatic**  **Post-Surgery** | 80  10  10 | 75  20  5 | 91  4.5  4.5 | 95  0  5 | .405 |
| **BCVA (LogMAR)** | 1.8 (2.3-0.3) | 1 (2.3-0.2) | 1 (2.2-0.2) | 0.6 (2.3- 0.3) | .898 |
| **Type (%)**  **M-On**  **M-Off** | 35  65 | 40  60 | 50  50 | 50  50 | .705 |
| **Symptoms (%)**  **Visual Loss**  **VF Defects**  **Phosphenes** | 80  25  15 | 80  30  15 | 59  36  50 | 50  45  25 | .177 |

BCVA: best corrected visual acuity, M-On: macula-on, M-Off: macula-off, RD: retinal detachment,
VF: visual field.
